# Supplementary material for: High Poisson's ratio of Earth's inner core explained by carbon alloying
Source: Springer Nature journal article supplement (doi:10.1038/ngeo2370), 2015-02-23
Supplement: 41561_2015_BFngeo2370_MOESM304_ESM.pdf [file 41561_2015_BFngeo2370_MOESM304_ESM.pdf]

# High Poisson's ratio of Earth's inner core explained by carbon alloying

C. Prescher<sup>1,2</sup>, L. Dubrovinsky<sup>1</sup>, E. Bykova<sup>1</sup>, I. Kupenko<sup>1,3</sup>, K. Glazyrin<sup>1</sup>, A. Kantor<sup>1,3</sup>, C. McCammon<sup>1</sup>, M. Mookherjee<sup>1,4</sup>, Y. Nakajima<sup>1,5</sup>, N. Miyajima<sup>1</sup>, R. Sinmyo<sup>1</sup>, V. Cerantola<sup>1</sup>, N. Dubrovinskaia<sup>6</sup>, V. Prakapenka<sup>2</sup>, R. Rüffer<sup>3</sup>, A. Chumakov<sup>3,7</sup> & M. Hanfland<sup>3</sup>

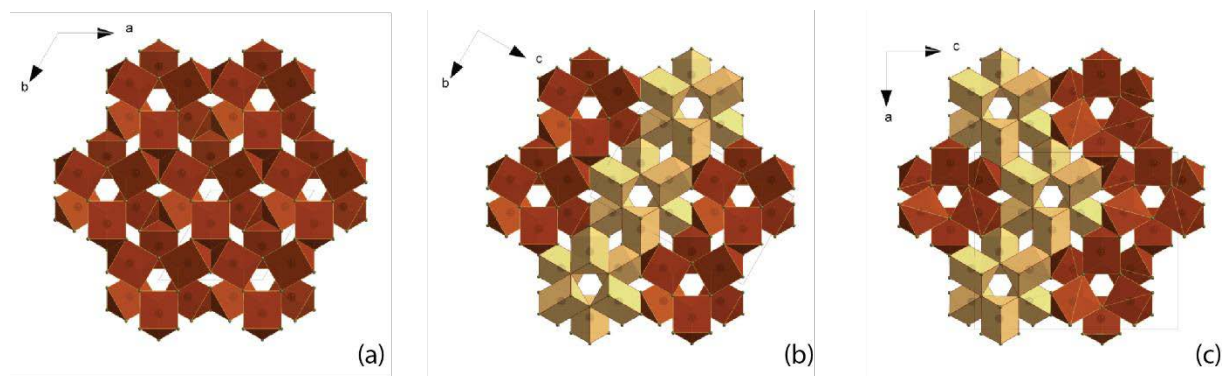

**Figure S1** | Crystal structures of known  $\text{Fe}_7\text{C}_3$  polytypes as polyhedral models. The building units are  $\text{CFe}_6$  prisms, where each 3 prisms are connected via shared vertices in triads and stacked with  $60^\circ$  rotation relative to their upper and lower neighbors in columns. The columns may be oriented upwards (light brown) or downwards (dark brown) and they are connected to each other by common edges. Different ways of column packing produce different  $\text{Fe}_7\text{C}_3$  polytypes: hexagonal  $P6_3mc$  (a), orthorhombic  $Pnma$  (b) and orthorhombic  $Pbca$  (c) structures. For the sake of comparison 3 similar units are depicted in an identical orientation, and thin solid lines designate unit cell edges.

### hkl (h = 0, 1, 2) layers

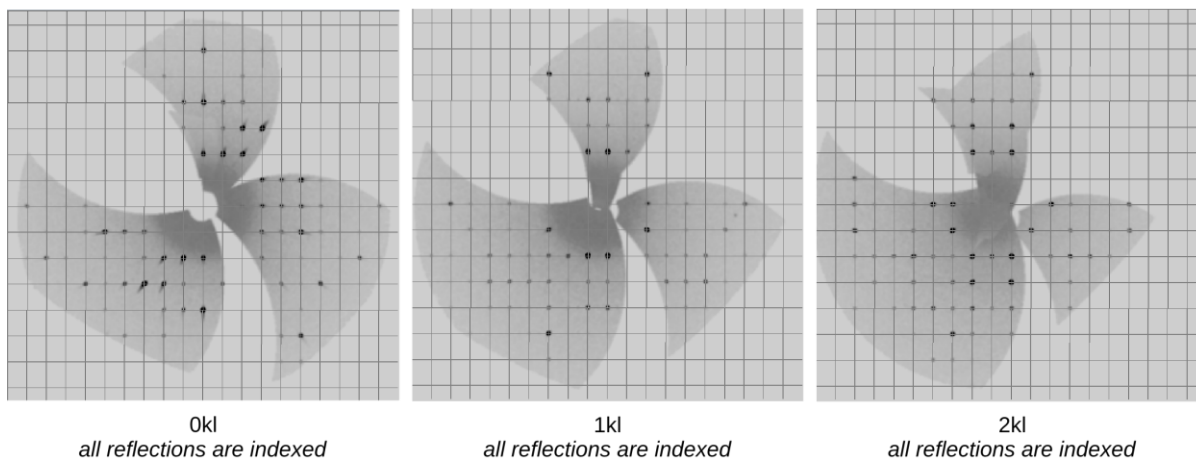

### hkl (l = 0, 1, 2) layers

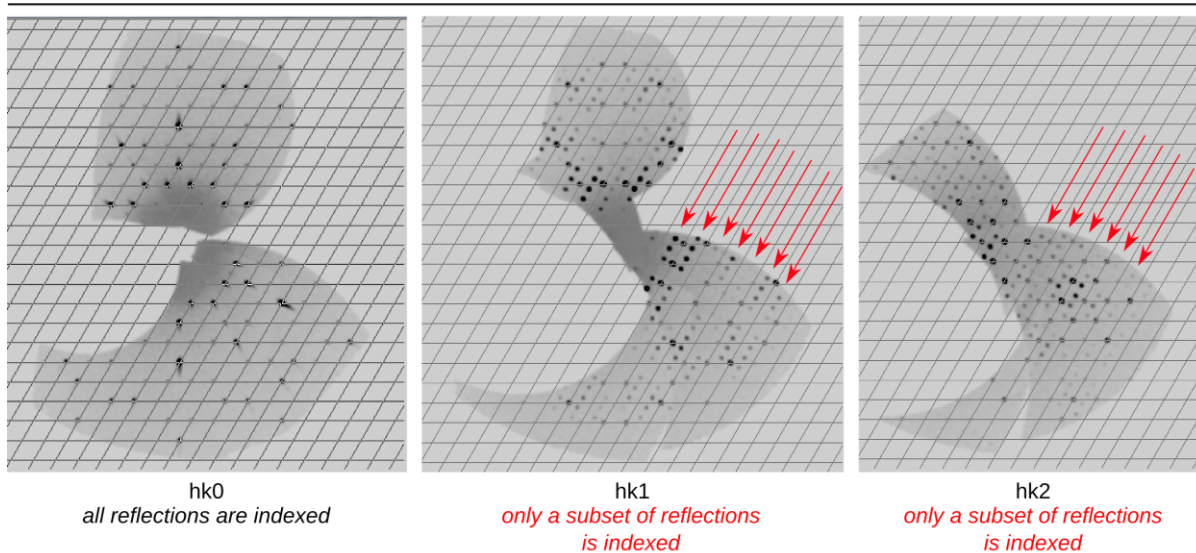

Fig S2. Reciprocal lattice reconstruction for experimentally observed o-Fe<sub>7</sub>C<sub>3</sub> reflections when considered in a hexagonal unit cell. The images show several lattice reconstructions of different *hkl* planes in the *P6<sub>3</sub>mc* space group. The grid in each image represents the reciprocal lattice of *P6<sub>3</sub>mc* and the dots are the actual reflections of o-Fe<sub>7</sub>C<sub>3</sub>. For some crystallographic orientations of o-Fe<sub>7</sub>C<sub>3</sub>, observed reflections may be described within a hexagonal space group, while other reflections (red arrows) can be described only within the orthorhombic *Pbca* space group. If the dataset is limited or some reflections are omitted for whatever reason, the symmetry of o-Fe<sub>7</sub>C<sub>3</sub> may be wrongly assigned as hexagonal.

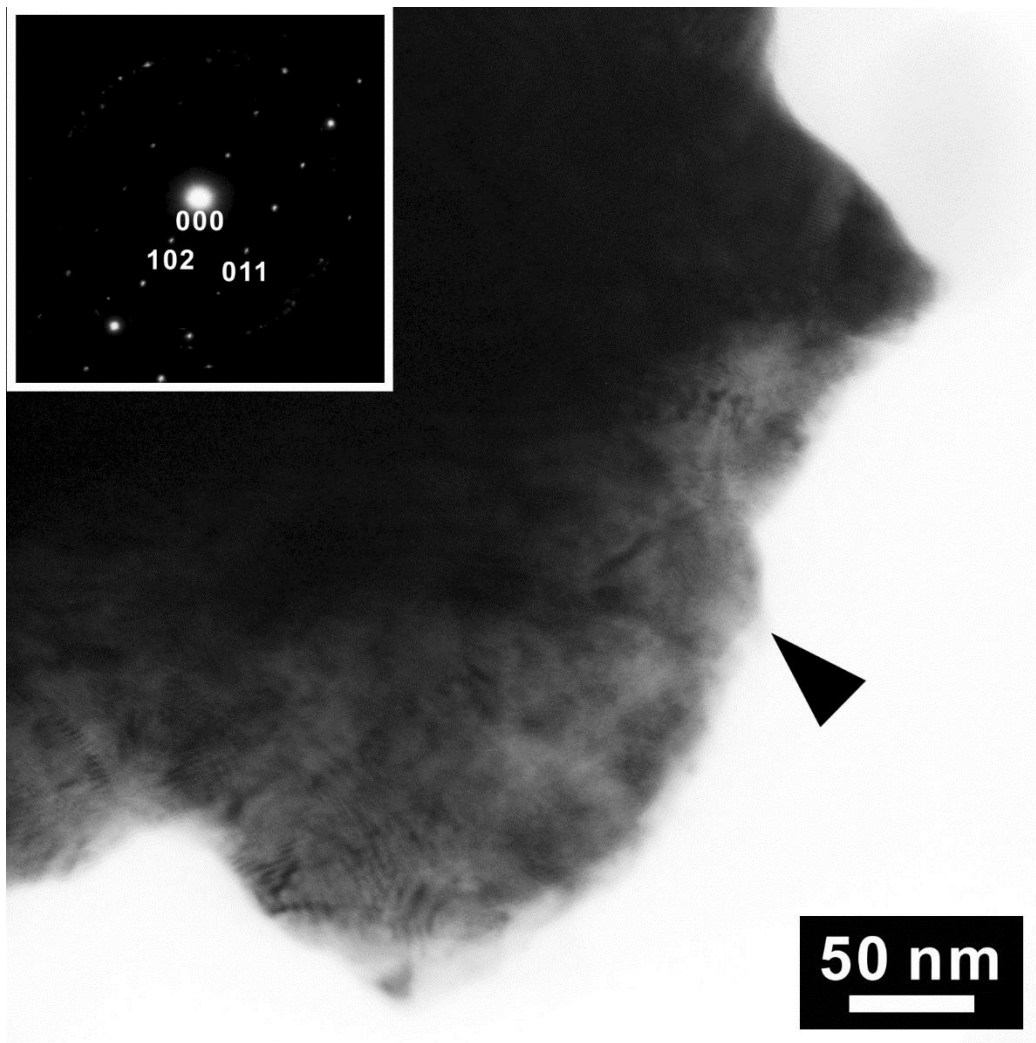

**Figure S3** | Bright field transmission electron microscopy image of  $o\text{-Fe}_7\text{C}_3$  recovered after melting in a laser heated diamond anvil cell at 180 GPa and about 4000 K. The selected area diffraction pattern (upper-left inset) of the centre grain indicated by the triangle arrow is indexed with a unit cell of  $a = 11.65 \text{ \AA}$ ,  $b = 4.35 \text{ \AA}$ ,  $c = 13.43 \text{ \AA}$  and a zone axis of  $[\bar{2} \bar{1} 1]$ .

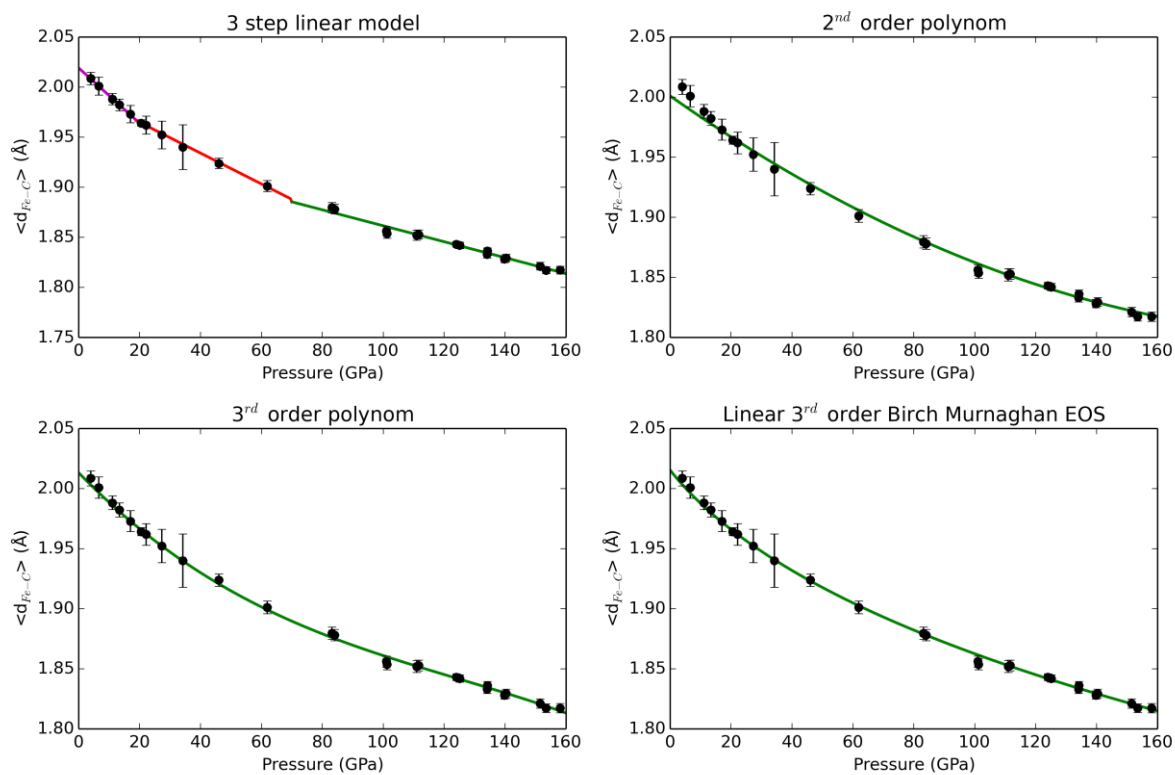

Figure S4. Comparison of fits to the variation of mean Fe-C distance versus pressure weighted according to the error bars. Systematic misfits demonstrate that neither 2<sup>nd</sup> nor 3<sup>rd</sup> order polynomials nor a 3<sup>rd</sup> order Birch Murnaghan equation of state provides an accurate model of the data. The three-step linear model is therefore preferred. Changes in slope coincide with electronic transitions in Fe<sub>7</sub>C<sub>3</sub>.

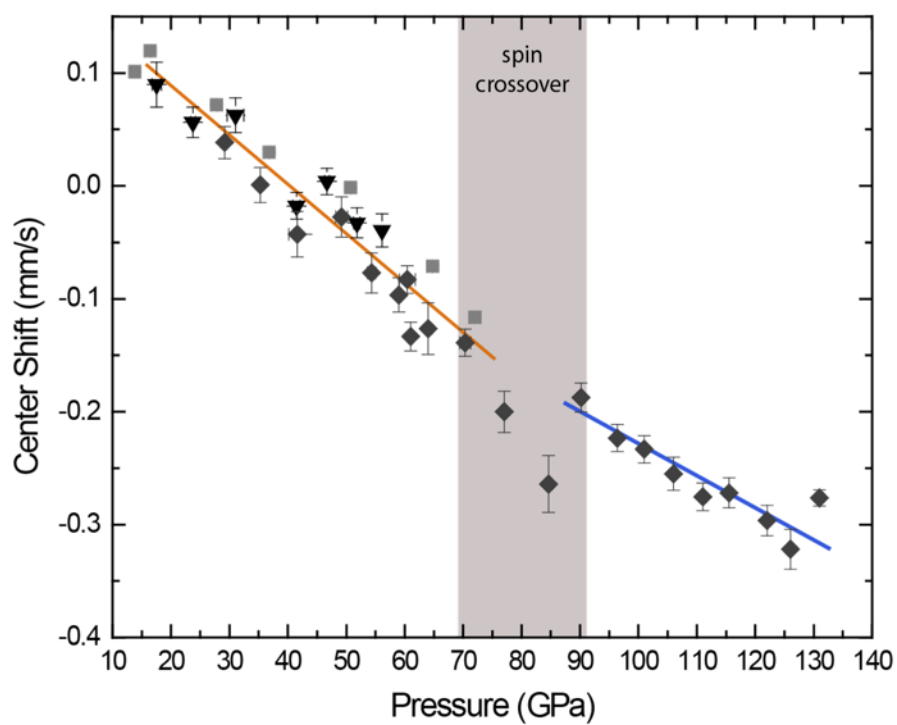

**Figure S5** | Pressure effect on the mean center shift of  $\text{Fe}_7\text{C}_3$  quadrupole doublets. Different experiments are indicated by different symbols. The data show two linear pressure trends with a change in slope between regions. The transition marks a change in the electronic configuration of  $\text{Fe}_7\text{C}_3$  which can be related to a paramagnetic to nonmagnetic transition.

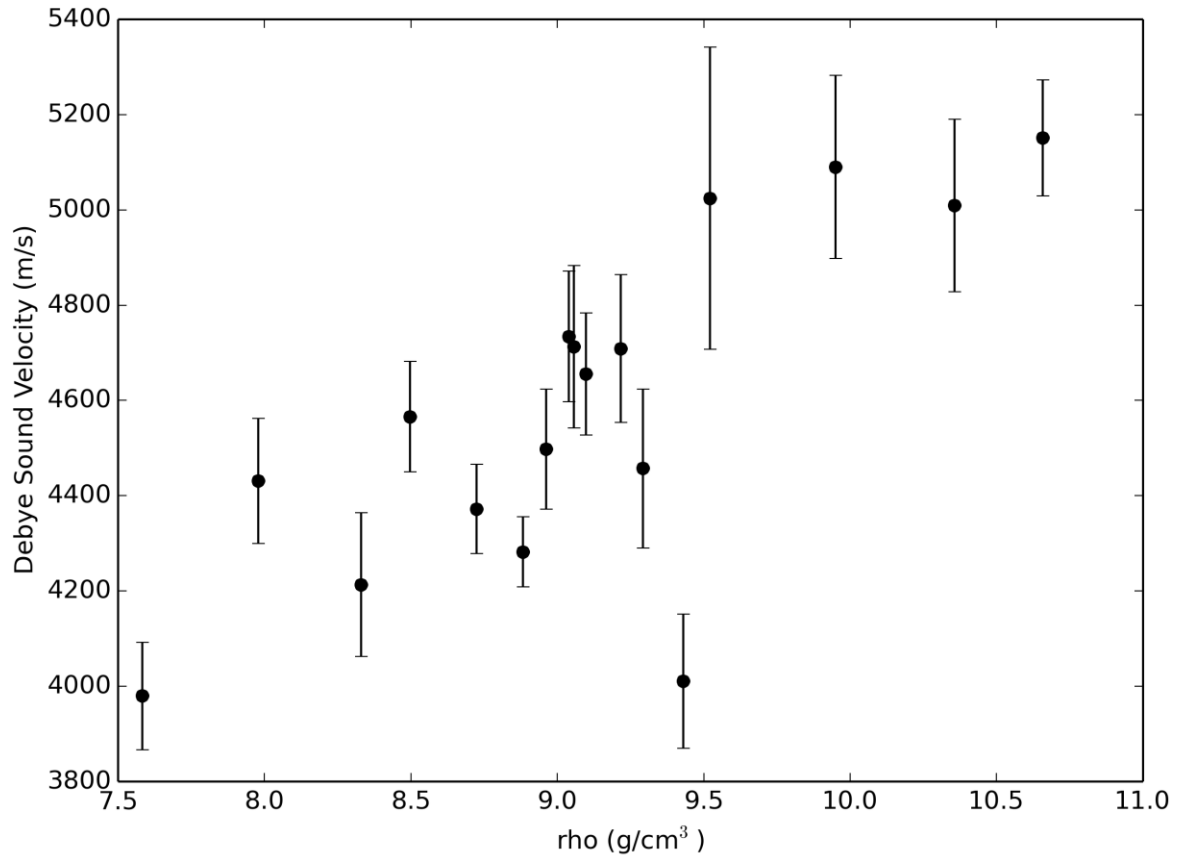

**Figure S6** | Variation of Debye sound velocity  $v_d$  with density. Debye sound velocity increases linearly up to 9.3 (g/cm<sup>3</sup>) but then decreases in the region of the para- to non-magnetic transition. Above 9.5 (g/cm<sup>3</sup>) where the nonmagnetic phase is stable,  $v_D$  remains nearly constant with increasing density.

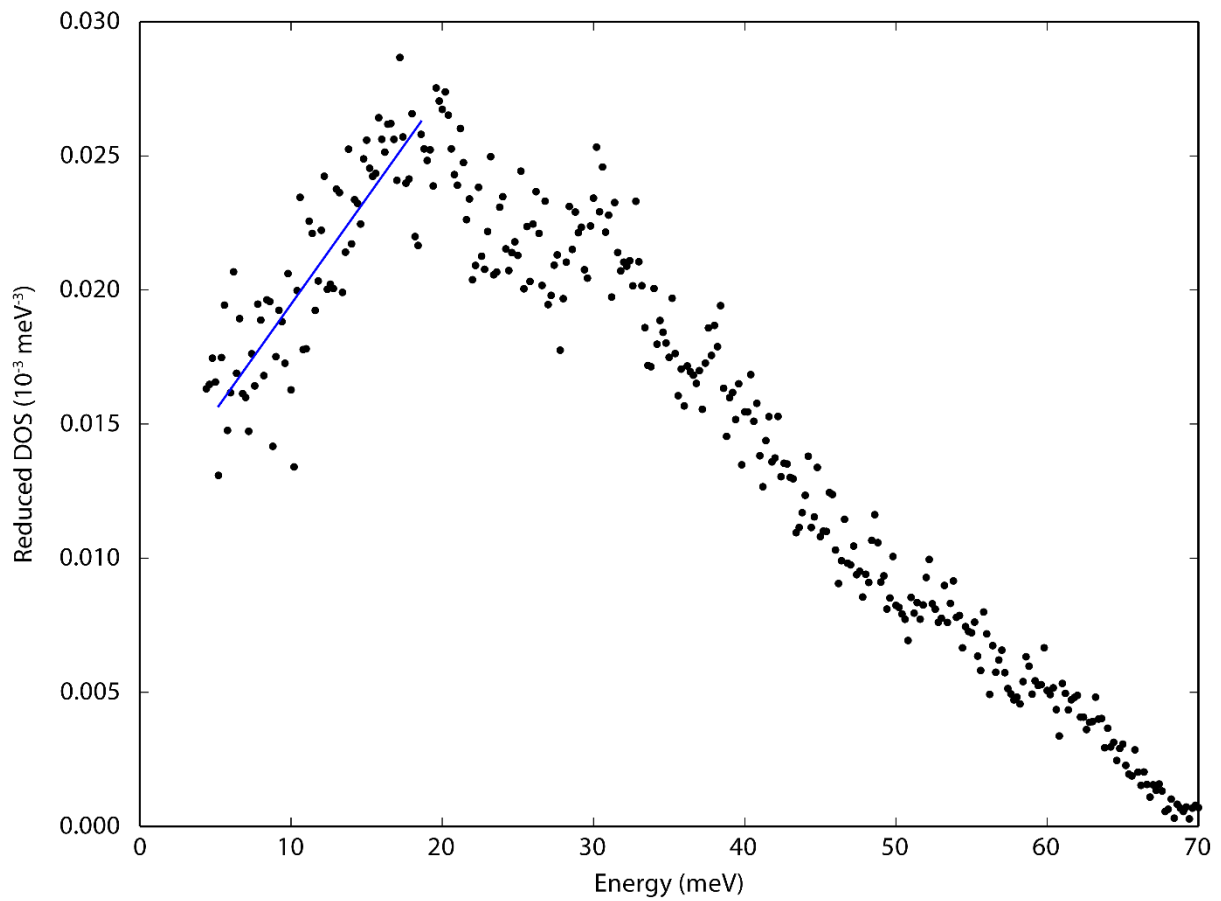

**Figure S7** | Reduced density of phonon states  $g(E)/E^2$  of  $\text{o-Fe}_7\text{C}_3$  at 158 GPa. The blue line is a linear fit to the low energy region which is used in the extrapolation to 0 meV to extract  $v_D$ .

## Extended data tables

**Table S1** | X-ray experiment details and crystallographic parameters of o-Fe<sub>7</sub>C<sub>3</sub> at ambient conditions

---

|                                                     |                                                                   |
|-----------------------------------------------------|-------------------------------------------------------------------|
| Empirical formula                                   | Fe <sub>7</sub> C <sub>3</sub>                                    |
| Formula weight (g/mol)                              | 426.98                                                            |
| Temperature (K)                                     | 296(2)                                                            |
| Wavelength (Å)                                      | 0.7107                                                            |
| Crystal system                                      | Orthorhombic                                                      |
| Space group                                         | <i>Pbca</i>                                                       |
| <i>a</i> (Å)                                        | 11.9747(4)                                                        |
| <i>b</i> (Å)                                        | 4.5202(2)                                                         |
| <i>c</i> (Å)                                        | 13.7572(6)                                                        |
| <i>V</i> (Å <sup>3</sup> )                          | 744.65(5)                                                         |
| <i>Z</i>                                            | 8                                                                 |
| Calculated density (g/cm <sup>3</sup> )             | 7.617                                                             |
| Linear absorption coefficient (mm <sup>-1</sup> )   | 26.278                                                            |
| <i>F</i> (000)                                      | 1600                                                              |
| Crystal size (mm <sup>3</sup> )                     | 0.1503 x 0.0885 x 0.0146                                          |
| Theta range for data collection (deg.)              | 2.96 to 34.27                                                     |
| Completeness to theta = 25.00°                      | 99.7 %                                                            |
| Index ranges                                        | -18 < <i>h</i> < 18,<br>-7 < <i>k</i> < 6,<br>-17 < <i>l</i> < 21 |
| Reflections collected                               | 4641                                                              |
| Independent reflections / <i>R</i> <sub>int</sub>   | 1473 / 0.0353                                                     |
| Max. and min. transmission                          | 0.682 and 0.206                                                   |
| Refinement method                                   | Full matrix least squares on <i>F</i> <sup>2</sup>                |
| Data / restraints / parameters                      | 1473 / 0 / 91                                                     |
| Goodness of fit on <i>F</i> <sup>2</sup>            | 1.033                                                             |
| Final <i>R</i> indices [ <i>I</i> > 2σ( <i>I</i> )] | <i>R</i> <sub>1</sub> = 0.0359, <i>wR</i> <sub>2</sub> = 0.0823   |
| <i>R</i> indices (all data)                         | <i>R</i> <sub>1</sub> = 0.0542, <i>wR</i> <sub>2</sub> = 0.0929   |
| Largest diff. peak and hole (e / Å <sup>3</sup> )   | 2.022 and -1.477                                                  |

---



**Table S2.** Synthesis conditions for o-Fe<sub>7</sub>C<sub>3</sub> at different experimental conditions.

| N  | Type of experiment               | Temperature, K | Pressure, GPa | Method of o-Fe <sub>7</sub> C <sub>3</sub> identification |
|----|----------------------------------|----------------|---------------|-----------------------------------------------------------|
| 1  | Multi-anvil apparatus, synthesis | 1673(50)       | 7.0(5)        | Single crystal diffraction; TEM                           |
| 2  | Multi-anvil apparatus, synthesis | 1473(50)       | 12.0(5)       | Single crystal diffraction; TEM                           |
| 3  | Multi-anvil apparatus, synthesis | 1973(50)       | 15.0(5)       | Single crystal diffraction                                |
| 4  | LH DAC**, in-house               | 2550(100)      | 48(2)         | Synchrotron PXRD***                                       |
| 5  | LH DAC, in-house                 | 2800(100)      | 77(2)         | Synchrotron PXRD                                          |
| 6  | LH DAC, in-house                 | 2750(100)      | 85(3)         | Synchrotron PXRD                                          |
| 7  | LH DAC, IDD-13                   | 2900(100)      | 57(1)         | Synchrotron PXRD                                          |
| 8  | LH DAC, IDD-13                   | 3100(100)      | 88(2)         | Synchrotron PXRD                                          |
| 9  | LH DAC, in-house                 | >3500          | 180(5)        | TEM                                                       |
| 10 | LH DAC, in-house                 | >3700          | 205(10)       | Synchrotron PXRD                                          |

\*Samples were recovered at ambient conditions

\*\*LH DAC – double-side laser-heated diamond anvil cell

\*\*\*PXRD – powder X-ray diffraction

**Table S3** | Interatomic distances (in Å) in CFe<sub>6</sub> trigonal prisms in the o-Fe<sub>7</sub>C<sub>3</sub> crystal structure at ambient conditions

| Prism 1                  |           | Prism 2                  |           | Prism 3                  |           |
|--------------------------|-----------|--------------------------|-----------|--------------------------|-----------|
| C1-Fe1                   | 1.984(5)  | C2-Fe2                   | 1.979(5)  | C3-Fe3                   | 1.964(5)  |
| C1-Fe4                   | 2.010(5)  | C2-Fe4#3                 | 1.997(5)  | C3-Fe4#5                 | 1.984(5)  |
| C1-Fe1#1                 | 2.014(5)  | C2-Fe3#1                 | 2.006(5)  | C3-Fe3#1                 | 2.025(5)  |
| C1-Fe5#2                 | 2.032(5)  | C2-Fe5#1                 | 2.038(5)  | C3-Fe6#1                 | 2.038(5)  |
| C1-Fe7#1                 | 2.033(5)  | C2-Fe1#1                 | 2.047(5)  | C3-Fe7#6                 | 2.043(5)  |
| C1-Fe2#1                 | 2.036(5)  | C2-Fe6#4                 | 2.057(5)  | C3-Fe2#1                 | 2.049(5)  |
| <i>Triangular bases:</i> |           | <i>Triangular bases:</i> |           | <i>Triangular bases:</i> |           |
| Fe1#1-Fe2#1              | 2.5532(8) | Fe1#1-Fe3#1              | 2.5261(8) | Fe2#1-Fe3#1              | 2.5453(8) |
| Fe1-Fe2#1                | 2.6776(8) | Fe1#1-Fe2                | 2.6782(8) | Fe2#1-Fe3                | 2.6608(8) |
| Fe1-Fe1#1                | 2.7208(8) | Fe2-Fe3#1                | 2.7406(8) | Fe3-Fe3#1                | 2.6901(8) |
| Fe5#2-Fe7#1              | 2.526(1)  | Fe5#1-Fe6#4              | 2.5292(8) | Fe6#1-Fe7#6              | 2.547(1)  |
| Fe4-Fe5#2                | 2.6072(8) | Fe4#3-Fe5#1              | 2.6072(8) | Fe4#5-Fe7#6              | 2.6851(9) |
| Fe4-Fe7#1                | 2.7414(9) | Fe4#3-Fe6#4              | 2.7393(8) | Fe4#5-Fe6#1              | 2.6722(8) |
| <i>Lateral faces:</i>    |           | <i>Lateral faces:</i>    |           | <i>Lateral faces:</i>    |           |
| Fe1-Fe4                  | 2.6266(8) | Fe1#1-Fe5#1              | 2.6239(9) | Fe2#1-Fe6#1              | 2.6198(8) |
| Fe2#1-Fe5#2              | 2.6358(8) | Fe2-Fe4#3                | 2.6334(9) | Fe3#1-Fe7#6              | 2.6281(8) |
| Fe1#1-Fe7#1              | 2.6592(8) | Fe3#1-Fe6#4              | 2.6809(9) | Fe3-Fe4#5                | 2.6741(8) |

Symmetry transformations used to generate equivalent atoms:

- #1  $\frac{1}{2} - x, \frac{1}{2} + y, z$
- #2  $1 - x, \frac{1}{2} + y, \frac{1}{2} - z$
- #3  $-\frac{1}{2} + x, y, \frac{1}{2} - z$
- #4  $-x, 1 - y, 1 - z$
- #5  $x, \frac{1}{2} - y, \frac{1}{2} + z$
- #6  $\frac{1}{2} - x, 1 - y, \frac{1}{2} + z$

**Table S4** | Lattice parameters, number of independent reflections  $N_{\text{refl}}$  and R1 factor derived from high-pressure single crystal X-ray diffraction measurements.

| P (GPa)   | Lattice Parameters |                    |                    | V ( $\text{\AA}^3$ ) | $N_{\text{refl}}$ | R1 (%) |
|-----------|--------------------|--------------------|--------------------|----------------------|-------------------|--------|
|           | a ( $\text{\AA}$ ) | b ( $\text{\AA}$ ) | c ( $\text{\AA}$ ) |                      |                   |        |
| 3.92(5)   | 11.9050(2)         | 4.4883(1)          | 13.705(3)          | 732.30(16)           | 341               | 2.78   |
| 6.55(5)   | 11.8691(3)         | 4.4668(2)          | 13.646(4)          | 723.5(2)             | 313               | 3.63   |
| 11.1(1)   | 11.8021(3)         | 4.4262(2)          | 13.567(4)          | 708.7(2)             | 313               | 2.07   |
| 13.4(1)   | 11.7674(3)         | 4.4061(2)          | 13.535(4)          | 701.8(2)             | 309               | 2.15   |
| 16.95(5)  | 11.7183(6)         | 4.3766(3)          | 13.485(8)          | 691.6(4)             | 319               | 3.13   |
| 20.5(1)   | 11.644(3)          | 4.3510(3)          | 13.434(2)          | 680.6(2)             | 253               | 4.26   |
| 22.2(1)   | 11.6483(4)         | 4.3414(2)          | 13.420(6)          | 678.6(3)             | 299               | 3.82   |
| 27.3(1)   | 11.5903(4)         | 4.3132(2)          | 13.347(6)          | 667.2(3)             | 299               | 5.42   |
| 34.2(1)   | 11.5119(5)         | 4.2766(3)          | 13.274(7)          | 653.5(3)             | 284               | 8.54   |
| 46.0(3)   | 11.403(3)          | 4.2300(3)          | 13.173(2)          | 635.4(2)             | 230               | 7.94   |
| 61.9(1)   | 11.252(3)          | 4.1721(3)          | 13.046(2)          | 612.44(19)           | 222               | 7.8    |
| 83.2(2)   | 11.103(3)          | 4.1110(3)          | 12.894(2)          | 588.54(19)           | 218               | 7.17   |
| 84.0(2)   | 11.096(3)          | 4.1156(3)          | 12.885(2)          | 588.42(19)           | 219               | 8.07   |
| 101.2(1)  | 10.959(5)          | 4.0476(6)          | 12.731(4)          | 564.7(3)             | 212               | 10.83  |
| 101.0(1)  | 10.959(5)          | 4.0587(6)          | 12.752(3)          | 567.2(3)             | 213               | 8.75   |
| 110.95(5) | 10.944(6)          | 4.0415(6)          | 12.729(4)          | 563.0(4)             | 210               | 9.09   |
| 111.7(1)  | 10.947(6)          | 4.0478(8)          | 12.716(5)          | 563.5(4)             | 216               | 6.83   |
| 124.0(0)  | 10.899(4)          | 4.0191(4)          | 12.658(3)          | 554.5(2)             | 325               | 7.59   |
| 125.2(1)  | 10.867(7)          | 4.0218(7)          | 12.662(4)          | 553.4(4)             | 307               | 7.89   |
| 134.2(2)  | 10.864(4)          | 3.9993(4)          | 12.602(3)          | 547.5(2)             | 311               | 7.56   |
| 134.1(2)  | 10.835(4)          | 3.9942(5)          | 12.586(2)          | 544.7(2)             | 319               | 8.52   |
| 139.8(1)  | 10.806(4)          | 3.9857(4)          | 12.562(3)          | 541.0(2)             | 319               | 8.16   |
| 140.3(2)  | 10.807(3)          | 3.985              | 12.568(2)          | 541.27(17)           | 320               | 7.46   |
| 151.6(2)  | 10.787(3)          | 3.9597(3)          | 12.486(2)          | 533.32(18)           | 298               | 7.27   |
| 151.6(2)  | 10.742(3)          | 3.9526(4)          | 12.482(2)          | 529.97(18)           | 310               | 8.53   |
| 158.0(1)  | 10.733(4)          | 3.9540(3)          | 12.493(2)          | 530.2(2)             | 294               | 7.91   |
| 157.9(2)  | 10.735(3)          | 3.9523(3)          | 12.4834(19)        | 529.64(17)           | 311               | 7.85   |

**Table S5** | Fractional atomic positions for the o-Fe<sub>7</sub>C<sub>3</sub> structure derived from high-pressure single crystal X-ray diffraction data.

| <b>P (GPa)</b> |                  | <b>3.92(5)</b> | <b>6.55(5)</b> | <b>11.1(1)</b> | <b>13.4(1)</b> | <b>16.95(5)</b> | <b>20.5(1)</b> |
|----------------|------------------|----------------|----------------|----------------|----------------|-----------------|----------------|
| C1             | x                | 0.8400(6)      | 0.8412(7)      | 0.8413(5)      | 0.8412(5)      | 0.8420(7)       | 0.8413(18)     |
|                | y                | 0.4646(15)     | 0.4661(18)     | 0.4651(12)     | 0.4666(12)     | 0.4698(17)      | 0.464(3)       |
|                | z                | 0.7666(13)     | 0.771(2)       | 0.7703(12)     | 0.7700(13)     | 0.7678(18)      | 0.7668(12)     |
|                | U <sub>int</sub> | 0.8400(6)      | 0.8412(7)      | 0.8413(5)      | 0.8412(5)      | 0.8420(7)       | 0.8413(18)     |
| C2             | x                | 0.5608(6)      | 0.5602(6)      | 0.5606(4)      | 0.5607(4)      | 0.5609(6)       | 0.5633(19)     |
|                | y                | 0.4652(13)     | 0.4620(17)     | 0.4651(11)     | 0.4646(11)     | 0.4692(17)      | 0.461(3)       |
|                | z                | 0.6204(12)     | 0.6232(18)     | 0.6224(12)     | 0.6237(12)     | 0.6206(18)      | 0.6189(10)     |
|                | U <sub>int</sub> | 0.5608(6)      | 0.5602(6)      | 0.5606(4)      | 0.5607(4)      | 0.5609(6)       | 0.5633(19)     |
| C3             | x                | 0.8438(6)      | 0.8439(7)      | 0.8424(5)      | 0.8431(5)      | 0.8427(7)       | 0.8455(19)     |
|                | y                | 0.4693(14)     | 0.4689(19)     | 0.4690(13)     | 0.4672(12)     | 0.4691(18)      | 0.471(3)       |
|                | z                | 0.4842(12)     | 0.4819(18)     | 0.4836(11)     | 0.4845(12)     | 0.4881(19)      | 0.4841(12)     |
|                | U <sub>int</sub> | 0.8438(6)      | 0.8439(7)      | 0.8424(5)      | 0.8431(5)      | 0.8427(7)       | 0.8455(19)     |
| Fe1            | x                | 0.81305(7)     | 0.81310(9)     | 0.81307(6)     | 0.81302(6)     | 0.81291(9)      | 0.8128(2)      |
|                | y                | 0.06027(16)    | 0.0591(2)      | 0.05772(15)    | 0.05684(17)    | 0.0559(2)       | 0.0561(4)      |
|                | z                | 0.71646(18)    | 0.7161(3)      | 0.71654(18)    | 0.71651(19)    | 0.7165(3)       | 0.71646(16)    |
|                | U <sub>int</sub> | 0.81305(7)     | 0.81310(9)     | 0.81307(6)     | 0.81302(6)     | 0.81291(9)      | 0.8128(2)      |
| Fe2            | x                | 0.62721(8)     | 0.62715(10)    | 0.62697(6)     | 0.62706(6)     | 0.62689(9)      | 0.6267(3)      |
|                | y                | 0.06041(18)    | 0.0594(2)      | 0.05812(15)    | 0.05683(15)    | 0.0562(2)       | 0.0560(4)      |
|                | z                | 0.62559(18)    | 0.6250(3)      | 0.62501(18)    | 0.62538(18)    | 0.6253(3)       | 0.62536(15)    |
|                | U <sub>int</sub> | 0.62721(8)     | 0.62715(10)    | 0.62697(6)     | 0.62706(6)     | 0.62689(9)      | 0.6267(3)      |
| Fe3            | x                | 0.81090(8)     | 0.81087(10)    | 0.81094(6)     | 0.81109(6)     | 0.81106(10)     | 0.8111(2)      |
|                | y                | 0.06989(17)    | 0.0689(2)      | 0.06737(16)    | 0.06642(16)    | 0.0650(2)       | 0.0646(4)      |
|                | z                | 0.53244(19)    | 0.5331(3)      | 0.53271(19)    | 0.53254(19)    | 0.5325(3)       | 0.53234(17)    |
|                | U <sub>int</sub> | 0.81090(8)     | 0.81087(10)    | 0.81094(6)     | 0.81109(6)     | 0.81106(10)     | 0.8111(2)      |
| Fe4            | x                | 0.91790(8)     | 0.91785(10)    | 0.91784(7)     | 0.91793(6)     | 0.91790(10)     | 0.9172(3)      |
|                | y                | 0.24093(15)    | 0.2410(2)      | 0.24106(13)    | 0.24085(14)    | 0.2409(2)       | 0.2409(3)      |
|                | z                | 0.8731(2)      | 0.8736(2)      | 0.8732(2)      | 0.8732(3)      | 0.8735(3)       | 0.87325(17)    |
|                | U <sub>int</sub> | 0.91790(8)     | 0.91785(10)    | 0.91784(7)     | 0.91793(6)     | 0.91790(10)     | 0.9172(3)      |
| Fe5            | x                | 1.02329(8)     | 1.02322(9)     | 1.02315(7)     | 1.02298(7)     | 1.02294(10)     | 1.0228(2)      |
|                | y                | 0.22815(18)    | 0.2285(2)      | 0.22954(16)    | 0.22995(16)    | 0.2308(2)       | 0.2324(4)      |
|                | z                | 0.71516(19)    | 0.7148(3)      | 0.7155(2)      | 0.7156(2)      | 0.7154(3)       | 0.71593(15)    |
|                | U <sub>int</sub> | 1.02329(8)     | 1.02322(9)     | 1.02315(7)     | 1.02298(7)     | 1.02294(10)     | 1.0228(2)      |
| Fe6            | x                | 0.52438(9)     | 0.52416(9)     | 0.52385(7)     | 0.52358(8)     | 0.52335(11)     | 0.5230(3)      |
|                | y                | 0.25023(15)    | 0.2503(2)      | 0.25042(15)    | 0.24990(15)    | 0.2499(2)       | 0.2502(3)      |
|                | z                | 0.4693(2)      | 0.4685(3)      | 0.4685(2)      | 0.4686(2)      | 0.4685(3)       | 0.46851(16)    |
|                | U <sub>int</sub> | 0.52438(9)     | 0.52416(9)     | 0.52385(7)     | 0.52358(8)     | 0.52335(11)     | 0.5230(3)      |
| Fe7            | x                | 0.70736(9)     | 0.70744(11)    | 0.70738(6)     | 0.70731(6)     | 0.70748(9)      | 0.7081(3)      |
|                | y                | 0.24818(16)    | 0.2481(2)      | 0.24793(14)    | 0.24775(14)    | 0.2477(2)       | 0.2480(3)      |
|                | z                | 0.87474(17)    | 0.8749(3)      | 0.8751(2)      | 0.8750(2)      | 0.8748(3)       | 0.87499(14)    |
|                | U <sub>int</sub> | 0.70736(9)     | 0.70744(11)    | 0.70738(6)     | 0.70731(6)     | 0.70748(9)      | 0.7081(3)      |

**Table S5** | Continued.

| <b>P (GPa)</b> |      | <b>22.2(1)</b> | <b>27.3(1)</b> | <b>34.2(1)</b> | <b>46.0(3)</b> | <b>61.9(1)</b> | <b>83.2(2)</b> |
|----------------|------|----------------|----------------|----------------|----------------|----------------|----------------|
| C1             | x    | 0.8420(8)      | 0.8415(12)     | 0.840(2)       | 0.835(3)       | 0.835(3)       | 0.846(3)       |
|                | y    | 0.467(2)       | 0.468(3)       | 0.467(5)       | 0.462(5)       | 0.465(6)       | 0.456(5)       |
|                | z    | 0.769(2)       | 0.772(3)       | 0.774(6)       | 0.764(2)       | 0.766(2)       | 0.7696(16)     |
|                | Uint | 0.8420(8)      | 0.8415(12)     | 0.840(2)       | 0.835(3)       | 0.835(3)       | 0.846(3)       |
| C2             | x    | 0.5607(7)      | 0.5613(10)     | 0.5609(16)     | 0.563(3)       | 0.568(3)       | 0.572(4)       |
|                | y    | 0.467(2)       | 0.464(2)       | 0.469(4)       | 0.464(4)       | 0.464(5)       | 0.461(5)       |
|                | z    | 0.6219(18)     | 0.624(3)       | 0.623(4)       | 0.6193(12)     | 0.6187(15)     | 0.6148(16)     |
|                | Uint | 0.5607(7)      | 0.5613(10)     | 0.5609(16)     | 0.563(3)       | 0.568(3)       | 0.572(4)       |
| C3             | x    | 0.8435(8)      | 0.8428(12)     | 0.8428(19)     | 0.841(3)       | 0.841(3)       | 0.850(3)       |
|                | y    | 0.468(2)       | 0.466(3)       | 0.485(5)       | 0.486(5)       | 0.487(6)       | 0.477(5)       |
|                | z    | 0.4843(18)     | 0.486(3)       | 0.480(4)       | 0.483(2)       | 0.481(2)       | 0.4912(18)     |
|                | Uint | 0.8435(8)      | 0.8428(12)     | 0.8428(19)     | 0.841(3)       | 0.841(3)       | 0.850(3)       |
| Fe1            | x    | 0.81302(9)     | 0.81269(14)    | 0.8123(2)      | 0.8122(4)      | 0.8126(4)      | 0.8127(5)      |
|                | y    | 0.0552(3)      | 0.0542(3)      | 0.0530(6)      | 0.0517(7)      | 0.0507(8)      | 0.0487(10)     |
|                | z    | 0.7166(3)      | 0.7169(4)      | 0.7164(7)      | 0.7169(3)      | 0.7169(3)      | 0.7161(3)      |
|                | Uint | 0.81302(9)     | 0.81269(14)    | 0.8123(2)      | 0.8122(4)      | 0.8126(4)      | 0.8127(5)      |
| Fe2            | x    | 0.62694(11)    | 0.62687(15)    | 0.6269(2)      | 0.6265(5)      | 0.6271(5)      | 0.6249(6)      |
|                | y    | 0.0548(3)      | 0.0533(4)      | 0.0517(6)      | 0.0527(7)      | 0.0508(7)      | 0.0475(9)      |
|                | z    | 0.6249(3)      | 0.6250(4)      | 0.6251(7)      | 0.6252(2)      | 0.6250(3)      | 0.6242(3)      |
|                | Uint | 0.62694(11)    | 0.62687(15)    | 0.6269(2)      | 0.6265(5)      | 0.6271(5)      | 0.6249(6)      |
| Fe3            | x    | 0.81113(11)    | 0.81117(16)    | 0.8110(3)      | 0.8113(3)      | 0.8112(3)      | 0.8114(4)      |
|                | y    | 0.0637(3)      | 0.0622(3)      | 0.0610(6)      | 0.0575(6)      | 0.0554(7)      | 0.0521(10)     |
|                | z    | 0.5325(3)      | 0.5320(4)      | 0.5312(7)      | 0.5321(3)      | 0.5324(3)      | 0.5315(3)      |
|                | Uint | 0.81113(11)    | 0.81117(16)    | 0.8110(3)      | 0.8113(3)      | 0.8112(3)      | 0.8114(4)      |
| Fe4            | x    | 0.91771(13)    | 0.91767(18)    | 0.9172(3)      | 0.9151(6)      | 0.9180(7)      | 0.9188(9)      |
|                | y    | 0.2407(2)      | 0.2411(3)      | 0.2413(5)      | 0.2398(6)      | 0.2404(6)      | 0.2408(8)      |
|                | z    | 0.8734(3)      | 0.8730(4)      | 0.8722(7)      | 0.87338(16)    | 0.8737(3)      | 0.8751(2)      |
|                | Uint | 0.91771(13)    | 0.91767(18)    | 0.9172(3)      | 0.9151(6)      | 0.9180(7)      | 0.9188(9)      |
| Fe5            | x    | 1.02297(10)    | 1.02293(15)    | 1.0231(3)      | 1.0218(4)      | 1.0224(5)      | 1.0204(5)      |
|                | y    | 0.2328(3)      | 0.2338(3)      | 0.2353(6)      | 0.2366(6)      | 0.2383(6)      | 0.2409(7)      |
|                | z    | 0.7158(3)      | 0.7166(4)      | 0.7170(7)      | 0.7166(3)      | 0.7168(3)      | 0.7177(3)      |
|                | Uint | 1.02297(10)    | 1.02293(15)    | 1.0231(3)      | 1.0218(4)      | 1.0224(5)      | 1.0204(5)      |
| Fe6            | x    | 0.52326(10)    | 0.52309(15)    | 0.5231(3)      | 0.5209(4)      | 0.5214(5)      | 0.5209(5)      |
|                | y    | 0.2493(2)      | 0.2491(3)      | 0.2500(5)      | 0.2504(5)      | 0.2507(6)      | 0.2503(8)      |
|                | z    | 0.4683(3)      | 0.4679(4)      | 0.4684(7)      | 0.4684(3)      | 0.4688(3)      | 0.4674(3)      |
|                | Uint | 0.52326(10)    | 0.52309(15)    | 0.5231(3)      | 0.5209(4)      | 0.5214(5)      | 0.5209(5)      |
| Fe7            | x    | 0.70750(12)    | 0.70745(18)    | 0.7078(3)      | 0.7086(6)      | 0.7068(8)      | 0.7055(7)      |
|                | y    | 0.2477(3)      | 0.2478(3)      | 0.2479(6)      | 0.2478(6)      | 0.2474(5)      | 0.2473(7)      |
|                | z    | 0.8747(2)      | 0.8748(4)      | 0.8751(6)      | 0.87529(15)    | 0.8754(2)      | 0.8761(2)      |
|                | Uint | 0.70750(12)    | 0.70745(18)    | 0.7078(3)      | 0.7086(6)      | 0.7068(8)      | 0.7055(7)      |

**Table S5** | Continued.

| <b>P (GPa)</b> |      | <b>84.0(2)</b> | <b>101.2(1)</b> | <b>101.0(1)</b> | <b>110.95(5)</b> | <b>111.7(1)</b> |
|----------------|------|----------------|-----------------|-----------------|------------------|-----------------|
| C1             | x    | 0.841(3)       | 0.833(2)        | 0.839(3)        | 0.835(3)         | 0.844(3)        |
|                | y    | 0.466(4)       | 0.471(5)        | 0.464(5)        | 0.470(5)         | 0.461(5)        |
|                | z    | 0.7718(18)     | 0.7623(17)      | 0.7683(18)      | 0.7626(19)       | 0.770(2)        |
|                | Uint | 0.841(3)       | 0.833(2)        | 0.839(3)        | 0.835(3)         | 0.844(3)        |
| C2             | x    | 0.572(3)       | 0.564(3)        | 0.571(2)        | 0.570(4)         | 0.565(3)        |
|                | y    | 0.465(4)       | 0.468(4)        | 0.463(3)        | 0.466(4)         | 0.467(3)        |
|                | z    | 0.6214(13)     | 0.6199(14)      | 0.6223(10)      | 0.6192(13)       | 0.6232(11)      |
|                | Uint | 0.572(3)       | 0.564(3)        | 0.571(2)        | 0.570(4)         | 0.565(3)        |
| C3             | x    | 0.841(3)       | 0.833(3)        | 0.843(3)        | 0.839(3)         | 0.836(2)        |
|                | y    | 0.481(4)       | 0.481(5)        | 0.479(4)        | 0.479(4)         | 0.482(4)        |
|                | z    | 0.4846(18)     | 0.4835(18)      | 0.4848(18)      | 0.4846(18)       | 0.4820(17)      |
|                | Uint | 0.841(3)       | 0.833(3)        | 0.843(3)        | 0.839(3)         | 0.836(2)        |
| Fe1            | x    | 0.8122(4)      | 0.8120(5)       | 0.8121(3)       | 0.8123(5)        | 0.8126(3)       |
|                | y    | 0.0496(8)      | 0.0480(9)       | 0.0486(7)       | 0.0471(8)        | 0.0478(7)       |
|                | z    | 0.7166(3)      | 0.7175(3)       | 0.7165(3)       | 0.7174(3)        | 0.7166(2)       |
|                | Uint | 0.8122(4)      | 0.8120(5)       | 0.8121(3)       | 0.8123(5)        | 0.8126(3)       |
| Fe2            | x    | 0.6271(4)      | 0.6255(6)       | 0.6266(4)       | 0.6257(5)        | 0.6267(4)       |
|                | y    | 0.0477(6)      | 0.0467(8)       | 0.0465(6)       | 0.0456(8)        | 0.0457(6)       |
|                | z    | 0.6253(2)      | 0.6252(3)       | 0.62539(19)     | 0.6254(2)        | 0.62519(18)     |
|                | Uint | 0.6271(4)      | 0.6255(6)       | 0.6266(4)       | 0.6257(5)        | 0.6267(4)       |
| Fe3            | x    | 0.8113(3)      | 0.8111(4)       | 0.8113(3)       | 0.8115(4)        | 0.8111(3)       |
|                | y    | 0.0544(8)      | 0.0516(9)       | 0.0522(7)       | 0.0506(8)        | 0.0510(6)       |
|                | z    | 0.5323(3)      | 0.5316(3)       | 0.5322(2)       | 0.5322(3)        | 0.5322(2)       |
|                | Uint | 0.8113(3)      | 0.8111(4)       | 0.8113(3)       | 0.8115(4)        | 0.8111(3)       |
| Fe4            | x    | 0.9173(5)      | 0.9181(10)      | 0.9172(5)       | 0.9185(8)        | 0.9175(6)       |
|                | y    | 0.2408(7)      | 0.2405(7)       | 0.2409(6)       | 0.2411(7)        | 0.2398(6)       |
|                | z    | 0.87309(17)    | 0.8735(2)       | 0.87322(15)     | 0.87330(19)      | 0.87323(16)     |
|                | Uint | 0.9173(5)      | 0.9181(10)      | 0.9172(5)       | 0.9185(8)        | 0.9175(6)       |
| Fe5            | x    | 1.0212(4)      | 1.0208(5)       | 1.0208(4)       | 1.0208(5)        | 1.0203(3)       |
|                | y    | 0.2420(6)      | 0.2417(7)       | 0.2434(6)       | 0.2434(7)        | 0.2433(5)       |
|                | z    | 0.7176(2)      | 0.7168(3)       | 0.7173(2)       | 0.7170(3)        | 0.7178(2)       |
|                | Uint | 1.0212(4)      | 1.0208(5)       | 1.0208(4)       | 1.0208(5)        | 1.0203(3)       |
| Fe6            | x    | 0.5207(4)      | 0.5202(5)       | 0.5203(4)       | 0.5200(5)        | 0.5202(3)       |
|                | y    | 0.2499(5)      | 0.2490(6)       | 0.2500(5)       | 0.2489(7)        | 0.2501(5)       |
|                | z    | 0.4688(2)      | 0.4685(3)       | 0.4687(2)       | 0.4687(3)        | 0.4688(2)       |
|                | Uint | 0.5207(4)      | 0.5202(5)       | 0.5203(4)       | 0.5200(5)        | 0.5202(3)       |
| Fe7            | x    | 0.7068(4)      | 0.7064(7)       | 0.7069(4)       | 0.7057(6)        | 0.7066(4)       |
|                | y    | 0.2476(6)      | 0.2468(7)       | 0.2472(6)       | 0.2464(6)        | 0.2470(5)       |
|                | z    | 0.87497(19)    | 0.8758(2)       | 0.87522(19)     | 0.87556(18)      | 0.87531(19)     |
|                | Uint | 0.7068(4)      | 0.7064(7)       | 0.7069(4)       | 0.7057(6)        | 0.7066(4)       |

**Table S5** | Continued.

| <b>P (GPa)</b> |      | <b>124.0(0)</b> | <b>125.2(1)</b> | <b>134.2(2)</b> | <b>134.1(2)</b> | <b>139.8(1)</b> |
|----------------|------|-----------------|-----------------|-----------------|-----------------|-----------------|
| C1             | x    | 0.8446(18)      | 0.8415(19)      | 0.844(2)        | 0.843(2)        | 0.843(2)        |
|                | y    | 0.465(3)        | 0.470(4)        | 0.464(4)        | 0.464(4)        | 0.467(4)        |
|                | z    | 0.7673(11)      | 0.7659(13)      | 0.7651(15)      | 0.7673(15)      | 0.7677(14)      |
|                | Uint | 0.8446(18)      | 0.8415(19)      | 0.844(2)        | 0.843(2)        | 0.843(2)        |
| C2             | x    | 0.569(2)        | 0.571(2)        | 0.573(2)        | 0.571(3)        | 0.565(3)        |
|                | y    | 0.466(3)        | 0.461(3)        | 0.463(3)        | 0.457(4)        | 0.466(3)        |
|                | z    | 0.6227(8)       | 0.6221(10)      | 0.6204(11)      | 0.6222(12)      | 0.6235(13)      |
|                | Uint | 0.569(2)        | 0.571(2)        | 0.573(2)        | 0.571(3)        | 0.565(3)        |
| C3             | x    | 0.8463(16)      | 0.8469(17)      | 0.8475(19)      | 0.844(2)        | 0.845(2)        |
|                | y    | 0.470(2)        | 0.473(3)        | 0.470(3)        | 0.471(3)        | 0.482(4)        |
|                | z    | 0.4831(10)      | 0.4839(10)      | 0.4844(11)      | 0.4833(13)      | 0.4818(12)      |
|                | Uint | 0.8463(16)      | 0.8469(17)      | 0.8475(19)      | 0.844(2)        | 0.845(2)        |
| Fe1            | x    | 0.8127(3)       | 0.8130(3)       | 0.8125(3)       | 0.8130(3)       | 0.8130(3)       |
|                | y    | 0.0467(5)       | 0.0462(5)       | 0.0467(6)       | 0.0455(6)       | 0.0463(6)       |
|                | z    | 0.71700(17)     | 0.71648(18)     | 0.71664(19)     | 0.71625(19)     | 0.7169(2)       |
|                | Uint | 0.8127(3)       | 0.8130(3)       | 0.8125(3)       | 0.8130(3)       | 0.8130(3)       |
| Fe2            | x    | 0.6277(3)       | 0.6267(3)       | 0.6274(3)       | 0.6262(4)       | 0.6277(3)       |
|                | y    | 0.0450(4)       | 0.0456(5)       | 0.0452(5)       | 0.0446(6)       | 0.0452(5)       |
|                | z    | 0.62517(14)     | 0.62560(15)     | 0.62531(16)     | 0.62520(17)     | 0.62522(17)     |
|                | Uint | 0.6277(3)       | 0.6267(3)       | 0.6274(3)       | 0.6262(4)       | 0.6277(3)       |
| Fe3            | x    | 0.8122(2)       | 0.8124(3)       | 0.8125(2)       | 0.8125(3)       | 0.8116(3)       |
|                | y    | 0.0496(5)       | 0.0492(5)       | 0.0494(5)       | 0.0487(6)       | 0.0494(5)       |
|                | z    | 0.53209(16)     | 0.53270(17)     | 0.5325(2)       | 0.53262(18)     | 0.5324(2)       |
|                | Uint | 0.8122(2)       | 0.8124(3)       | 0.8125(2)       | 0.8125(3)       | 0.8116(3)       |
| Fe4            | x    | 0.9173(4)       | 0.9184(4)       | 0.9170(4)       | 0.9180(4)       | 0.9178(4)       |
|                | y    | 0.2404(4)       | 0.2412(5)       | 0.2408(4)       | 0.2402(5)       | 0.2396(5)       |
|                | z    | 0.87300(14)     | 0.87301(12)     | 0.87319(17)     | 0.87313(13)     | 0.8734(2)       |
|                | Uint | 0.9173(4)       | 0.9184(4)       | 0.9170(4)       | 0.9180(4)       | 0.9178(4)       |
| Fe5            | x    | 1.0209(3)       | 1.0212(3)       | 1.0207(3)       | 1.0207(3)       | 1.0204(3)       |
|                | y    | 0.2446(4)       | 0.2464(5)       | 0.2451(5)       | 0.2462(5)       | 0.2458(5)       |
|                | z    | 0.71695(16)     | 0.71672(16)     | 0.71708(18)     | 0.71673(18)     | 0.71694(18)     |
|                | Uint | 1.0209(3)       | 1.0212(3)       | 1.0207(3)       | 1.0207(3)       | 1.0204(3)       |
| Fe6            | x    | 0.5207(3)       | 0.5206(3)       | 0.5205(3)       | 0.5204(3)       | 0.5204(3)       |
|                | y    | 0.2495(4)       | 0.2502(4)       | 0.2491(4)       | 0.2502(5)       | 0.2503(4)       |
|                | z    | 0.46917(16)     | 0.46853(16)     | 0.46928(17)     | 0.46858(18)     | 0.46922(18)     |
|                | Uint | 0.5207(3)       | 0.5206(3)       | 0.5205(3)       | 0.5204(3)       | 0.5204(3)       |
| Fe7            | x    | 0.7068(3)       | 0.7067(3)       | 0.7069(3)       | 0.7064(3)       | 0.7069(3)       |
|                | y    | 0.2468(4)       | 0.2479(5)       | 0.2461(4)       | 0.2463(5)       | 0.2470(5)       |
|                | z    | 0.87530(16)     | 0.87543(11)     | 0.8753(2)       | 0.87531(12)     | 0.8750(2)       |
|                | Uint | 0.7068(3)       | 0.7067(3)       | 0.7069(3)       | 0.7064(3)       | 0.7069(3)       |

**Table S5** |Continued.

| <b>P (GPa)</b> |      | <b>151.6(2)</b> | <b>158.0(1)</b> | <b>157.9(2)</b> |
|----------------|------|-----------------|-----------------|-----------------|
| C1             | x    | 0.839(2)        | 0.843(3)        | 0.841(2)        |
|                | y    | 0.467(4)        | 0.471(4)        | 0.468(4)        |
|                | z    | 0.7663(15)      | 0.7683(16)      | 0.7662(17)      |
|                | Uint | 0.839(2)        | 0.843(3)        | 0.841(2)        |
| C2             | x    | 0.566(3)        | 0.576(3)        | 0.568(4)        |
|                | y    | 0.452(4)        | 0.469(3)        | 0.460(4)        |
|                | z    | 0.6217(12)      | 0.6214(13)      | 0.6221(13)      |
|                | Uint | 0.566(3)        | 0.576(3)        | 0.568(4)        |
| C3             | x    | 0.847(2)        | 0.845(2)        | 0.848(2)        |
|                | y    | 0.472(3)        | 0.475(3)        | 0.472(3)        |
|                | z    | 0.4803(13)      | 0.4854(13)      | 0.4838(14)      |
|                | Uint | 0.847(2)        | 0.845(2)        | 0.848(2)        |
| Fe1            | x    | 0.8126(3)       | 0.8124(3)       | 0.8126(3)       |
|                | y    | 0.0445(6)       | 0.0450(6)       | 0.0442(6)       |
|                | z    | 0.71625(18)     | 0.7166(2)       | 0.71656(19)     |
|                | Uint | 0.8126(3)       | 0.8124(3)       | 0.8126(3)       |
| Fe2            | x    | 0.6269(4)       | 0.6274(4)       | 0.6266(4)       |
|                | y    | 0.0438(5)       | 0.0448(5)       | 0.0436(5)       |
|                | z    | 0.62527(16)     | 0.62537(19)     | 0.62527(16)     |
|                | Uint | 0.6269(4)       | 0.6274(4)       | 0.6266(4)       |
| Fe3            | x    | 0.8123(3)       | 0.8118(3)       | 0.8127(3)       |
|                | y    | 0.0464(6)       | 0.0483(5)       | 0.0458(5)       |
|                | z    | 0.53258(18)     | 0.5325(2)       | 0.53258(18)     |
|                | Uint | 0.8123(3)       | 0.8118(3)       | 0.8127(3)       |
| Fe4            | x    | 0.9178(4)       | 0.9170(4)       | 0.9181(5)       |
|                | y    | 0.2398(5)       | 0.2395(5)       | 0.2403(5)       |
|                | z    | 0.87316(13)     | 0.8733(2)       | 0.87316(14)     |
|                | Uint | 0.9178(4)       | 0.9170(4)       | 0.9181(5)       |
| Fe5            | x    | 1.0201(3)       | 1.0203(3)       | 1.0204(3)       |
|                | y    | 0.2454(6)       | 0.2458(5)       | 0.2464(6)       |
|                | z    | 0.71647(18)     | 0.7177(2)       | 0.71696(19)     |
|                | Uint | 1.0201(3)       | 1.0203(3)       | 1.0204(3)       |
| Fe6            | x    | 0.5197(3)       | 0.5197(3)       | 0.5201(3)       |
|                | y    | 0.2503(5)       | 0.2505(4)       | 0.2498(4)       |
|                | z    | 0.46838(17)     | 0.4692(2)       | 0.46894(18)     |
|                | Uint | 0.5197(3)       | 0.5197(3)       | 0.5201(3)       |
| Fe7            | x    | 0.7064(3)       | 0.7062(3)       | 0.7065(3)       |
|                | y    | 0.2463(5)       | 0.2463(5)       | 0.2459(5)       |
|                | z    | 0.87555(13)     | 0.8754(2)       | 0.87542(13)     |
|                | Uint | 0.7064(3)       | 0.7062(3)       | 0.7065(3)       |



**Table S6** | Isothermal bulk modulus  $K_T$ , shear modulus  $G$ , Debye velocity  $v_D$ , bulk velocity  $v_\phi$ , compressional wave velocity  $v_P$ , shear wave velocity  $v_S$  and Poisson's ratio  $\nu$  at 300 K and 1800 K for o-Fe<sub>7</sub>C<sub>3</sub>. Errors in pressure were estimated from the difference in ruby fluorescence measurements before and after each NIS data collection. Densities were calculated from the SXRD equation-of-state parameters.

| $P$<br>(GPa)       | $\rho$<br>(g/cm <sup>3</sup> ) | $K_T$<br>(GPa) | $G$<br>(GPa) | $v_D$<br>(m/s) | $v_\phi$<br>(m/s) | $v_P$<br>(m/s) | $v_S$<br>(m/s) | $\nu$   |
|--------------------|--------------------------------|----------------|--------------|----------------|-------------------|----------------|----------------|---------|
| <b>300 K</b>       |                                |                |              |                |                   |                |                |         |
| 0(0)               | 7.58(1)                        | 168(5)         | 97(6)        | 3980(113)      | 4709(64)          | 6267(71)       | 3581(107)      | 0.26(2) |
| 10(0)              | 7.98(1)                        | 226(5)         | 127(8)       | 4431(131)      | 5326(61)          | 7038(67)       | 3985(125)      | 0.26(3) |
| 21(0)              | 8.33(2)                        | 286(6)         | 118(9)       | 4213(151)      | 5863(61)          | 7297(63)       | 3763(144)      | 0.32(3) |
| 27(0)              | 8.50(2)                        | 318(6)         | 142(8)       | 4566(116)      | 6116(63)          | 7724(66)       | 4085(110)      | 0.31(2) |
| 36(0)              | 8.72(2)                        | 364(7)         | 132(6)       | 4372(94)       | 6460(62)          | 7871(63)       | 3895(89)       | 0.34(2) |
| 42.8(8)            | 8.88(3)                        | 398(8)         | 129(5)       | 4282(74)       | 6697(72)          | 8011(72)       | 3806(70)       | 0.35(2) |
| 46(0)              | 8.96(2)                        | 417(8)         | 144(9)       | 4498(126)      | 6817(62)          | 8236(63)       | 4003(120)      | 0.35(3) |
| 50(0)              | 9.04(2)                        | 434(8)         | 161(10)      | 4734(137)      | 6931(63)          | 8472(65)       | 4219(131)      | 0.34(3) |
| 51(0)              | 9.06(2)                        | 439(8)         | 160(12)      | 4713(171)      | 6959(63)          | 8482(64)       | 4199(162)      | 0.34(4) |
| 53(2)              | 9.10(4)                        | 448(11)        | 156(9)       | 4655(128)      | 7020(86)          | 8496(87)       | 4144(122)      | 0.34(3) |
| 59.0(5)            | 9.22(2)                        | 478(9)         | 162(11)      | 4709(155)      | 7198(66)          | 8672(67)       | 4189(148)      | 0.35(3) |
| 63(0)              | 9.29(2)                        | 497(9)         | 145(12)      | 4457(167)      | 7311(64)          | 8620(64)       | 3955(159)      | 0.37(4) |
| 70.5(5)            | 9.43(2)                        | 532(9)         | 118(9)       | 4011(141)      | 7514(67)          | 8557(66)       | 3545(134)      | 0.40(4) |
| 75.8(3)            | 9.52(2)                        | 557(10)        | 190(26)      | 5025(317)      | 7652(67)          | 9230(68)       | 4471(302)      | 0.35(6) |
| 103(3)             | 9.95(5)                        | 683(19)        | 203(17)      | 5090(192)      | 8287(115)         | 9793(115)      | 4518(183)      | 0.36(4) |
| 133(3)             | 10.36(5)                       | 818(19)        | 204(16)      | 5009(181)      | 8889(104)         | 10258(103)     | 4434(173)      | 0.39(4) |
| 158(5)             | 10.66(6)                       | 929(27)        | 221(11)      | 5151(122)      | 9334(139)         | 10715(136)     | 4557(116)      | 0.39(3) |
| <b>1800(200) K</b> |                                |                |              |                |                   |                |                |         |
| 50(1)              | 9.04(3)                        | 434(9)         | 154(11)      | 4630(155)      | 6928(76)          | 8406(77)       | 4123(148)      | 0.34(3) |
| 62(1)              | 9.27(3)                        | 492(10)        | 150(8)       | 4532(115)      | 7283(74)          | 8639(74)       | 4025(109)      | 0.36(3) |
| 63(2)              | 9.29(4)                        | 497(13)        | 98(12)       | 3680(207)      | 7311(96)          | 8217(94)       | 3247(197)      | 0.41(6) |
| 85(2)              | 9.67(4)                        | 600(14)        | 132(8)       | 4175(114)      | 7878(91)          | 8956(89)       | 3689(108)      | 0.40(3) |
